# Supplementary material for: Heavily N-doped monolayer graphene electrodes used for high-performance N-channel polymeric thin film transistors
Source: Royal Society of Chemistry journal article supplement (doi:10.1039/c6ra20496a), 2016-01-01
Supplement: c6ra20496a1.pdf [file c6ra20496a1.pdf]

**Heavily N-doped monolayer graphene electrodes used for  
high-performance N-channel polymeric thin film  
transistors**

Guoqing Zhou, Guoxing Pan, Linzhi Wei, Tian Li and Fapei Zhang\*

High Magnetic Field Laboratory, Chinese Academy of Science, Hefei 230031, P. R.

China

\*Address correspondence to [fzhang@hmfl.ac.cn](mailto:fzhang@hmfl.ac.cn)

**a)**

| element | weight ratio | atomic ratio |
|---------|--------------|--------------|
| C       | 6.30         | 11.56        |
| Si      | 24.98        | 34.45        |
| O       | 68.73        | 53.99        |
| total   | 100          |              |

**b)**

| element | weight ratio | atomic ratio |
|---------|--------------|--------------|
| C       | 4.85         | 8.97         |
| Si      | 26.8         | 37.2         |
| O       | 68           | 53.77        |
| Cs      | 0.34         | 0.06         |
| total   | 100          |              |

Table S1. Element contents for pristine graphene (a) and the Cs<sub>2</sub>CO<sub>3</sub>-doped graphene surface (b) estimated from energy dispersive spectroscopy (EDS) measurements.

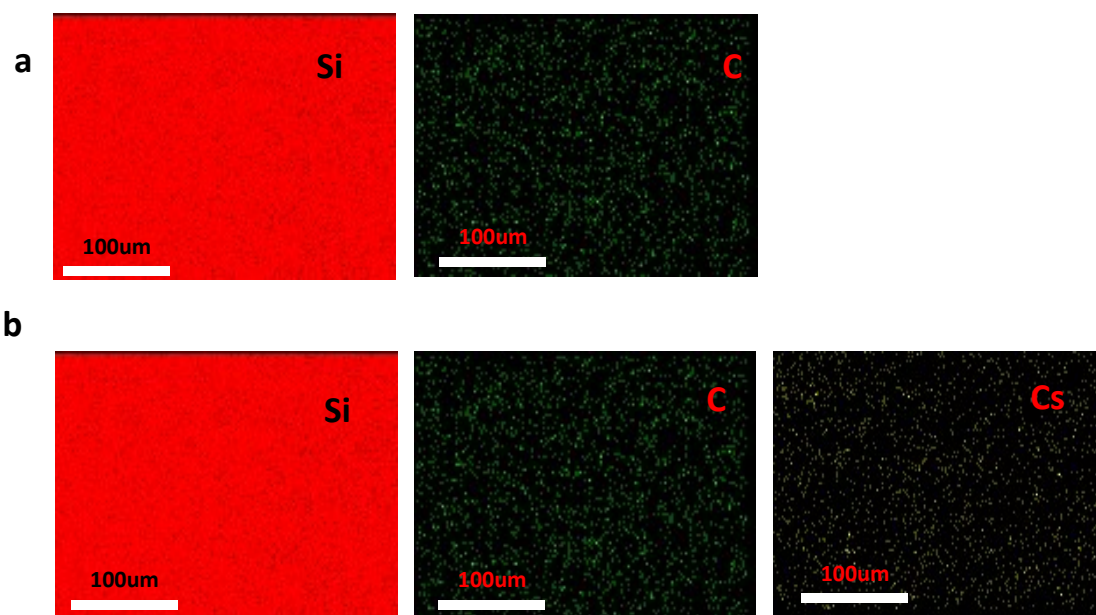

Figure S1 EDS elemental mapping for pristine graphene (a) and the  $\text{Cs}_2\text{CO}_3$ -doped graphene surface (b).

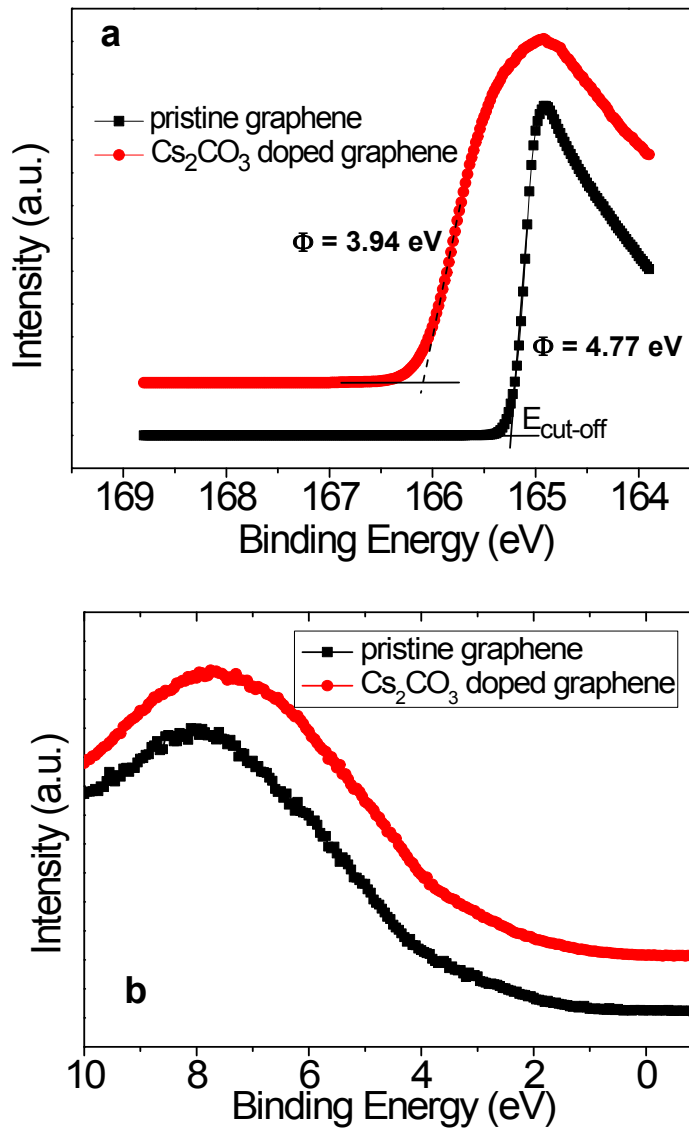

Figure S2 UPS spectra near the secondary electron cut-off region (a) and near the onset region (b) obtained from pristine graphene and the  $\text{Cs}_2\text{CO}_3$  doped graphene, respectively. The value of work function ( $\Phi$ ) is determined via the relation  $\Phi = h\nu - E_{\text{cut-off}}$ , where  $h\nu$  is the photon energy of synchrotron light source (170 eV) and  $E_{\text{cut-off}}$  is the binding energy of secondary electron cut-off.

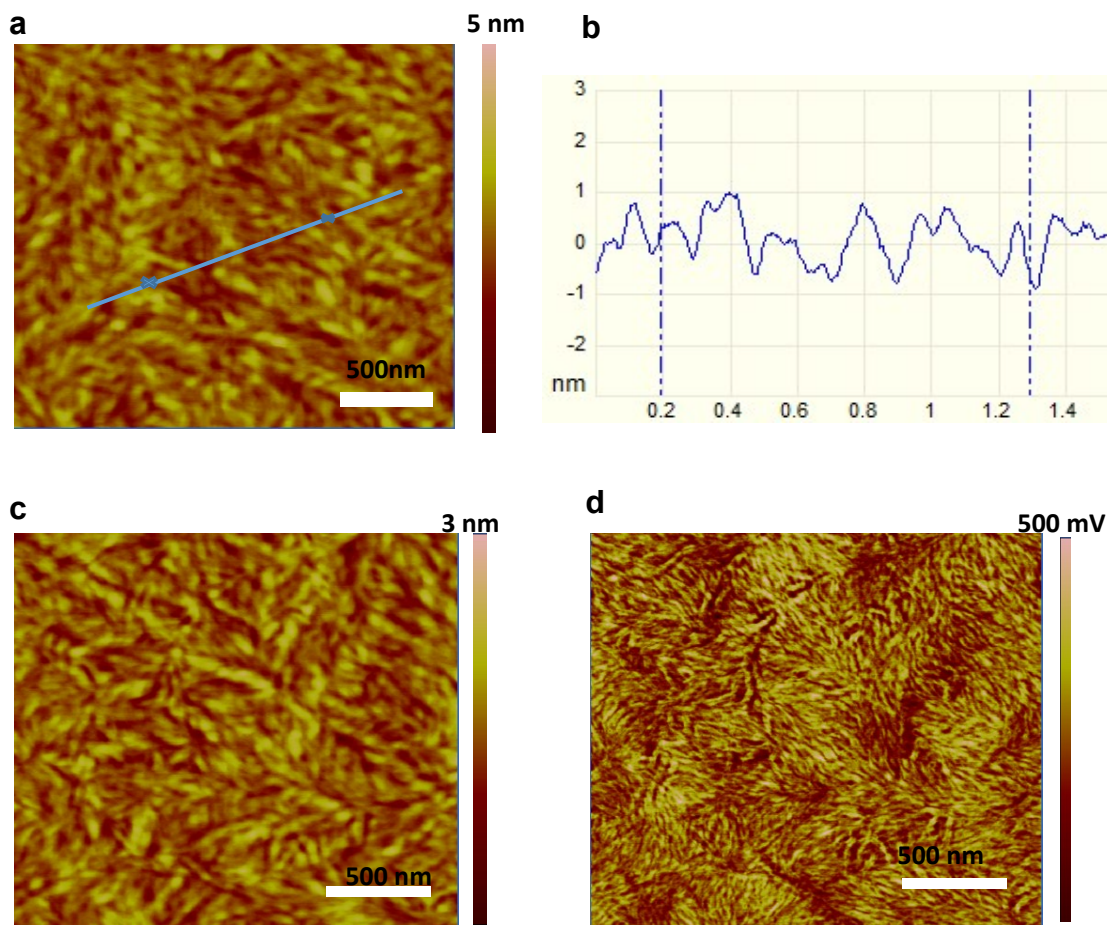

Figure S3 (a) AFM height image and (b) the profile of a highlighted line for the annealed P(NDI2OD-T2) film spin-coated on pristine graphene; (c) AFM height and (d) phase image for the annealed P(NDI2OD-T2) film spin-coated on the SiO<sub>2</sub>/Si substrate, respectively.

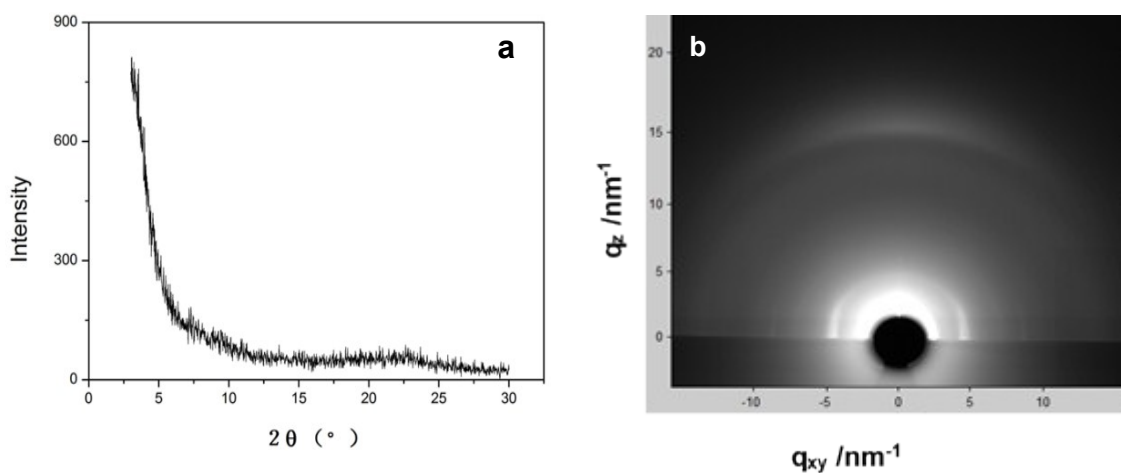

Figure S4 (a) Specular scan X-ray diffraction (XRD) pattern and (b) synchrotron-based 2D grazing incidence X-ray diffraction (GIXRD) pattern of the P(NDI2OD-T2) film deposited on the Cs<sub>2</sub>CO<sub>3</sub> doped graphene sheet (transferred on the SiO<sub>2</sub>/Si substrate). The sample was annealed at 110 °C for 4 h in the nitrogen atmosphere. The incidence angle of X-ray in the GIXRD experiment is 0.20°

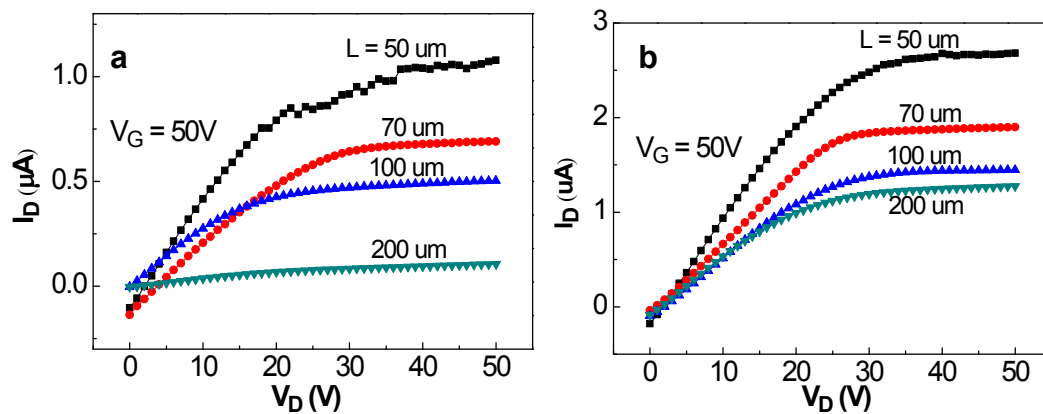

Figure S5. Channel length dependence of the output curves ( $I_D$ - $V_D$ ) at a gate voltage of 50V for the OFETs of P(NDI2OD-T2) using pristine graphene (a) and the  $\text{Cs}_2\text{CO}_3$ -doped graphene (b) as the S/D electrodes.
